# Supplementary material for: Mechanism of Cellular Formation and In Vivo Seeding Effects of Hexameric β-Amyloid Assemblies
Source: PubMed Central journal article supplement (PMC8639606; doi:10.1007/s12035-021-02567-8), 2021-10-04

# Supplementary Fig.S1

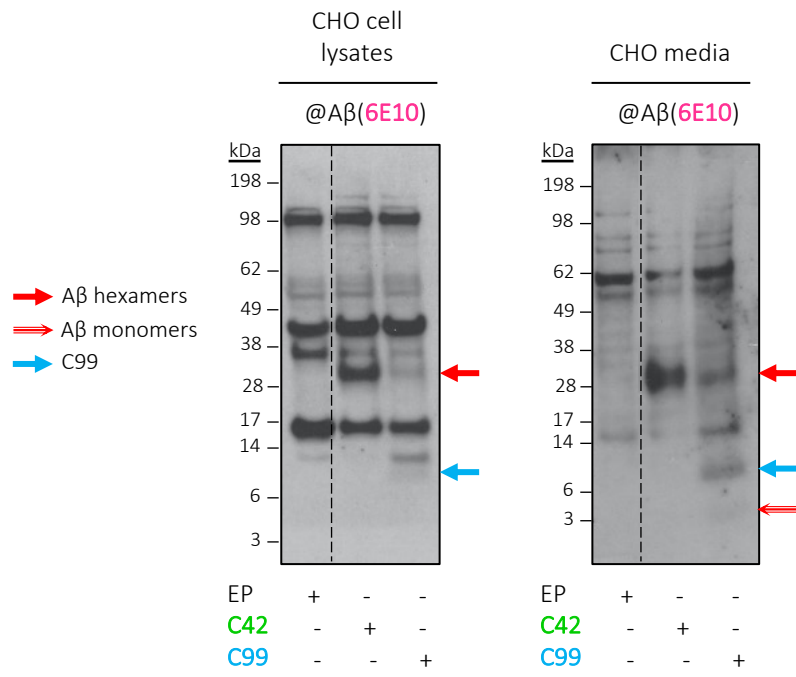



# Supplementary Fig.S3

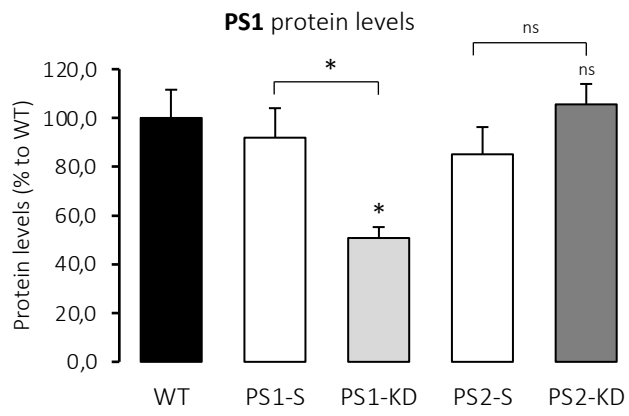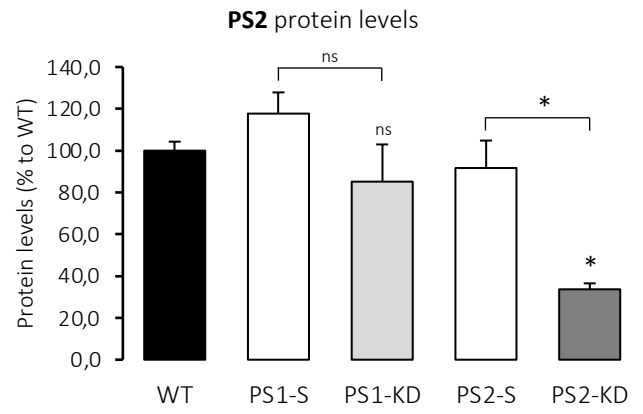

# Supplementary Fig.S4

Extracellular vesicles  
@APP-C-ter

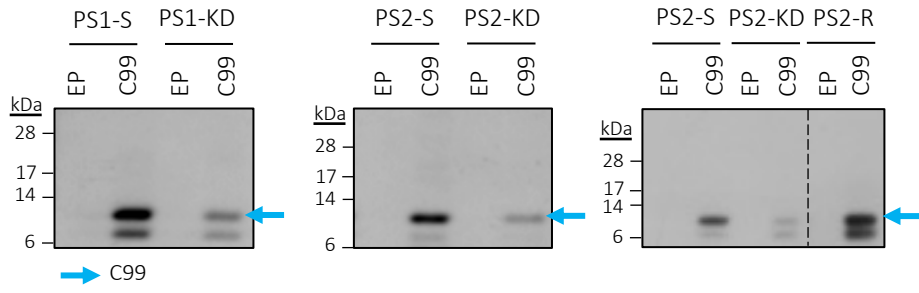

# Supplementary Fig.S5

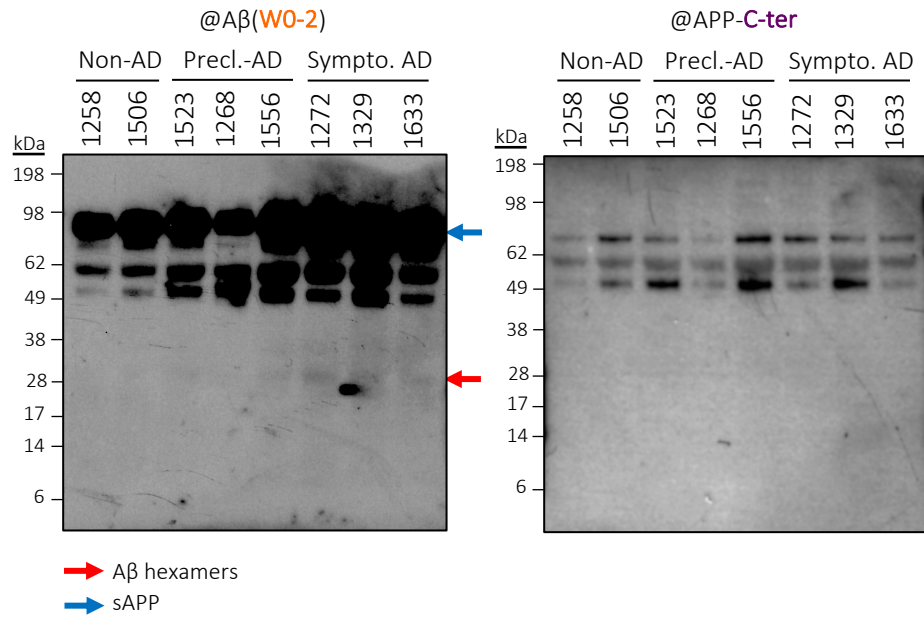

Supplement: 12035_2021_2567_MOESM2_ESM.pdf [file 12035_2021_2567_MOESM2_ESM.pdf]
